# Supplementary material
Source: PubMed Central journal article supplement (PMC7311235)
Supplement: NIHMS1577685-supplement-1.pdf [file NIHMS1577685-supplement-1.pdf]

## Supplementary Materials

**Table S1:** Sensitivity and Specificity at Cutoffs for Logistic Regression

| Threshold | Sensitivity | Specificity |
|-----------|-------------|-------------|
| 1.734628  | 0.000       | 1.000       |
| 0.734628  | 0.014       | 1.000       |
| 0.517931  | 0.880       | 1.000       |
| 0.51319   | 0.880       | 0.984       |
| 0.509926  | 0.925       | 0.984       |
| 0.509569  | 0.925       | 0.969       |
| 0.507519  | 0.940       | 0.969       |
| 0.486411  | 0.940       | 0.907       |
| 0.479858  | 0.955       | 0.907       |
| 0.46418   | 0.955       | 0.723       |
| 0.46393   | 0.970       | 0.723       |
| 0.460341  | 0.970       | 0.692       |
| 0.460298  | 0.985       | 0.692       |
| 0.458344  | 0.985       | 0.615       |
| 0.454378  | 1.000       | 0.615       |
| 0.444365  | 1.000       | 0.415       |
| 0.444273  | 1.000       | 0.384       |
| 0.374231  | 1.000       | 0.000       |

**Table S2:** Sensitivity, Specificity at Cutoffs for ISOLD Score

| Threshold | Sensitivity | Specificity |
|-----------|-------------|-------------|
| 2.00E+00  | 0.000       | 1.000       |
| 1.00E+00  | 0.014       | 1.000       |
| 9.70E-01  | 0.925       | 1.000       |
| 8.61E-01  | 0.925       | 0.969       |
| 7.75E-01  | 0.940       | 0.969       |
| 5.53E-01  | 0.940       | 0.938       |
| 4.47E-01  | 0.955       | 0.938       |
| 1.69E-08  | 0.955       | 0.676       |
| 1.61E-08  | 0.955       | 0.630       |
| 1.21E-08  | 0.955       | 0.584       |
| 8.46E-09  | 0.985       | 0.584       |
| 3.58E-09  | 0.985       | 0.446       |
| 3.48E-09  | 0.985       | 0.415       |
| 3.08E-09  | 1.000       | 0.415       |
| 2.10E-12  | 1.000       | 0.000       |
